# Supplementary material for: Transurethral Procedures for Lower Urinary Tract Symptoms Resulting From Benign Prostatic Enlargement: A Quality and Meta-Analysis
Source: PubMed Central journal article supplement — Int Neurourol J. 2013 Jun 30;17(2):59–66. doi: 10.5213/inj.2013.17.2.59 (PMC3713243; doi:10.5213/inj.2013.17.2.59), 2013-06-30
Supplement: inj-17-59-s001.pdf [file inj-17-59-s001.pdf]

## SUPPLEMENTARY MATERIALS

### REFERENCES

- S-1. Geavlete B, Georgescu D, Multescu R, Stanescu F, Jecu M, Geavlete P. Bipolar plasma vaporization vs monopolar and bipolar TURP-A prospective, randomized, long-term comparison. *Urology* 2011;78:930-5.
- S-2. Fagerstrom T, Nyman CR, Hahn RG. Complications and clinical outcome 18 months after bipolar and monopolar transurethral resection of the prostate. *J Endourol* 2011;25:1043-9.
- S-3. Fayad AS, Sheikh MG, Zakaria T, Elfotouh HA, Alsergany R. Holmium laser enucleation versus bipolar resection of the prostate: a prospective randomized study. Which to choose? *J Endourol* 2011;25:1347-52.
- S-4. Chen Q, Zhang L, Fan QL, Zhou J, Peng YB, Wang Z. Bipolar transurethral resection in saline vs traditional monopolar resection of the prostate: results of a randomized trial with a 2-year follow-up. *BJU Int* 2010;106:1339-43.
- S-5. Zhao Z, Zeng G, Zhong W, Mai Z, Zeng S, Tao X. A prospective, randomised trial comparing plasmakinetic enucleation to standard transurethral resection of the prostate for symptomatic benign prostatic hyperplasia: three-year follow-up results. *Eur Urol* 2010;58:752-8.
- S-6. Al-Ansari A, Younes N, Sampige VP, Al-Rumaihi K, Ghafouri A, Gul T, et al. GreenLight HPS 120-W laser vaporization versus transurethral resection of the prostate for treatment of benign prostatic hyperplasia: a randomized clinical trial with midterm follow-up. *Eur Urol* 2010;58:349-55.
- S-7. Simforoosh N, Abdi H, Kashi AH, Zare S, Tabibi A, Danesh A, et al. Open prostatectomy versus transurethral resection of the prostate, where are we standing in the new era? A randomized controlled trial. *Urol J* 2010;7:262-9.
- S-8. Ou R, You M, Tang P, Chen H, Deng X, Xie K. A randomized trial of transvesical prostatectomy versus transurethral resection of the prostate for prostate greater than 80 mL. *Urology* 2010;76:958-61.
- S-9. Elmansy HM, Elzayat E, Elhilali MM. Holmium laser ablation versus photoselective vaporization of prostate less than 60 cc: long-term results of a randomized trial. *J Urol* 2010;184:2023-8.
- S-10. Horasanli K, Silay MS, Altay B, Tanriverdi O, Sarica K, Miroglu C. Photoselective potassium titanyl phosphate (KTP) laser vaporization versus transurethral resection of the prostate for prostates larger than 70 mL: a short-term prospective randomized trial. *Urology* 2008;71:247-51.
- S-11. Alivizatos G, Skolarikos A, Chalikopoulos D, Papachristou C, Sopilidis O, Dellis A, et al. Transurethral photoselective vaporization versus transvesical open enucleation for prostatic adenomas >80ml: 12-mo results of a randomized prospective study. *Eur Urol* 2008;54:427-37.
- S-12. Iori F, Franco G, Leonardo C, Laurenti C, Tubaro A, D-Amico F, et al. Bipolar transurethral resection of prostate: clinical and urodynamic evaluation. *Urology* 2008;71:252-5.
- S-13. Kuntz RM, Lehrich K. Transurethral holmium laser enucleation versus transvesical open enucleation for prostate adenoma greater than 100 gm: a randomized prospective trial of 120 patients. *J Urol* 2002;168(4 Pt 1):1465-9.
- S-14. Kuntz RM, Lehrich K, Ahyai SA. Holmium laser enucleation of the prostate versus open prostatectomy for prostates greater than 100 grams: 5-year follow-up results of a randomised clinical trial. *Eur Urol* 2008;53:160-6.
- S-15. Michielsen DP, Debacker T, De Boe V, Van Lersberghe C, Kaufman L, Braeckman JG, et al. Bipolar transurethral resection in saline--an alternative surgical treatment for bladder outlet obstruction? *J Urol* 2007;178:2035-9.
- S-16. de Sio M, Autorino R, Quarto G, Damiano R, Perdona S, di Lorenzo G, et al. Gyrus bipolar versus standard monopolar transurethral resection of the prostate: a randomized prospective trial. *Urology* 2006;67:69-72.
- S-17. Ho HS, Yip SK, Lim KB, Fook S, Foo KT, Cheng CW. A prospective randomized study comparing monopolar and bipolar transurethral resection of prostate using transurethral resection in saline (TURIS) system. *Eur Urol* 2007;52:517-22.
- S-18. Kaya C, Ilktac A, Gokmen E, Ozturk M, Karaman IM. The long-term results of transurethral vaporization of the prostate using plasmakinetic energy. *BJU Int* 2007;99:845-8.
- S-19. Kuntz RM, Lehrich K, Ahyai S. Transurethral holmium laser enucleation of the prostate compared with transvesical open prostatectomy: 18-month follow-up of a randomized trial. *J Endourol* 2004;18:189-91.
- S-20. Ahyai SA, Lehrich K, Kuntz RM. Holmium laser enucleation versus transurethral resection of the prostate: 3-year follow-up results of a randomized clinical trial. *Eur Urol* 2007;52:1456-63.
- S-21. Patankar S, Jamkar A, Dobhada S, Gorde V. PlasmaKinetic Superpulse transurethral resection versus conventional transurethral resection of prostate. *J Endourol* 2006;20:215-9.
- S-22. Nuhoglu B, Ayyildiz A, Karaguzel E, Cebeci O, Germyianoglu C. Plasmakinetic prostate resection in the treatment of benign prostate hyperplasia: results of 1-year follow up. *Int J Urol* 2006;13:21-4.

- S-23. Gupta N, Sivaramakrishna, Kumar R, Dogra PN, Seth A. Comparison of standard transurethral resection, transurethral vapour resection and holmium laser enucleation of the prostate for managing benign prostatic hyperplasia of >40 g. *BJU Int* 2006;97:85-9.
- S-24. Neill MG, Gilling PJ, Kennett KM, Frampton CM, Westenberg AM, Fraundorfer MR, et al. Randomized trial comparing holmium laser enucleation of prostate with plasmakinetic enucleation of prostate for treatment of benign prostatic hyperplasia. *Urology* 2006;68:1020-4.
- S-25. Naspro R, Suardi N, Salonia A, Scattoni V, Guazzoni G, Colombo R, et al. Holmium laser enucleation of the prostate versus open prostatectomy for prostates >70 g: 24-month follow-up. *Eur Urol* 2006;50:563-8.
- S-26. Bouchier-Hayes DM, Anderson P, Van Appledorn S, Bugeja P, Costello AJ. KTP laser versus transurethral resection: early results of a randomized trial. *J Endourol* 2006;20:580-5.
- S-27. Hon NH, Brathwaite D, Hussain Z, Ghiblawi S, Brace H, Hayne D, et al. A prospective, randomized trial comparing conventional transurethral prostate resection with PlasmaKinetic vaporization of the prostate: physiological changes, early complications and long-term followup. *J Urol* 2006;176:205-9.
- S-28. Singh H, Desai MR, Shrivastav P, Vani K. Bipolar versus monopolar transurethral resection of prostate: randomized controlled study. *J Endourol* 2005;19:333-8.
- S-29. Seckiner I, Yesilli C, Akduman B, Altan K, Mungan NA. A prospective randomized study for comparing bipolar plasmakinetic resection of the prostate with standard TURP. *Urol Int* 2006;76:139-43.
- S-30. Fung BT, Li SK, Yu CF, Lau BE, Hou SS. Prospective randomized controlled trial comparing plasmakinetic vaporessection and conventional transurethral resection of the prostate. *Asian J Surg* 2005;28:24-8.
- S-31. Tefekli A, Muslumanoglu AY, Baykal M, Binbay M, Tas A, Altunrende F. A hybrid technique using bipolar energy in transurethral prostate surgery: a prospective, randomized comparison. *J Urol* 2005;174(4 Pt 1):1339-43.
- S-32. Yang S, Lin WC, Chang HK, Hsu JM, Lin WR, Chow YC, et al. Gyrus plasmasect: is it better than monopolar transurethral resection of prostate? *Urol Int* 2004;73:258-61.
- S-33. Montorsi F, Naspro R, Salonia A, Suardi N, Briganti A, Zanoni M, et al. Holmium laser enucleation versus transurethral resection of the prostate: results from a 2-center, prospective, randomized trial in patients with obstructive benign prostatic hyperplasia. *J Urol* 2004;172(5 Pt 1):1926-9.
- S-34. Dunsmuir WD, McFarlane JP, Tan A, Dowling C, Downie J, Kourambas J, et al. Gyrus bipolar electrovaporization vs transurethral resection of the prostate: a randomized prospective single-blind trial with 1 y follow-up. *Prostate Cancer Prostatic Dis* 2003;6:182-6.
